# Supplementary material for: Succession Patterns of Microbial Composition and Activity following the Diesel Spill in an Urban River
Source: MDPI journal article supplement (doi:10.3390/microorganisms11030698), 2023-03-08
Supplement: s1 [file s1]

## Supplementary Material

### Succession patterns of microbial composition and activity following the diesel spill in an urban river

Ruiyu Yang, Chao Peng, Yuqiu Ye, Yun Tang, Lu Lu

**This file includes:**

Total Number of Figures: (1)

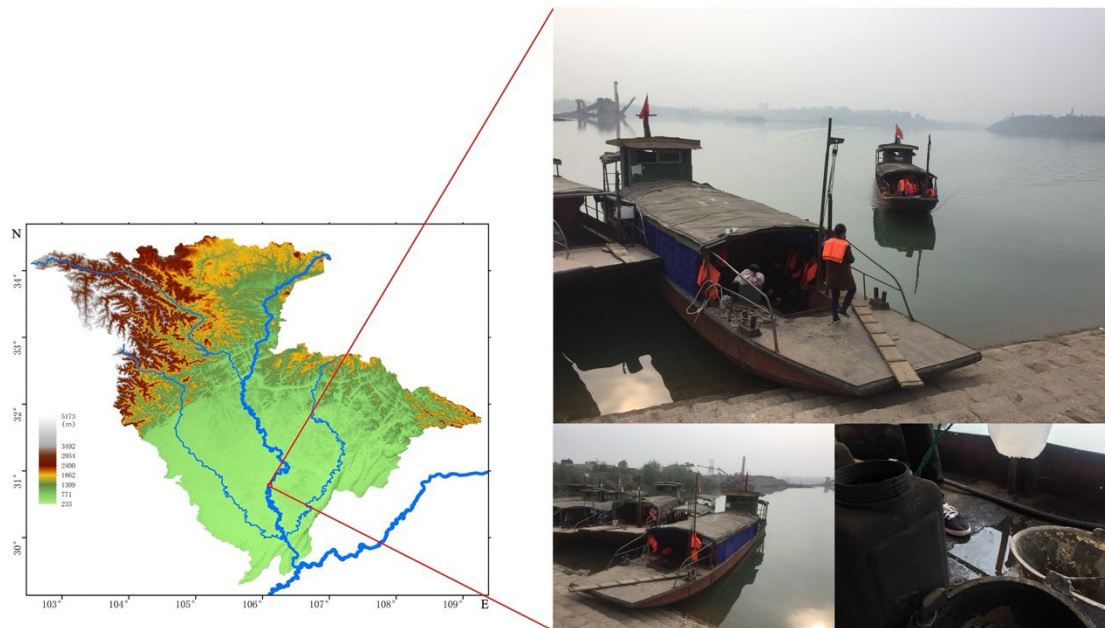

**Figure S1.** Map and photographs showing the location and surrounding environment of the sampling site in urban section (Nanchong) of the Jialing River.
